# Supplementary material for: Effects of Cognitive Behavioral Therapy on Pain and Sleep in Adults with Traumatic Brain Injury: A Systematic Review and Meta-Analysis
Source: Neural Plast. 2021 Nov 11;2021:6552246. doi: 10.1155/2021/6552246 (PMC8601855; doi:10.1155/2021/6552246)
Supplement: Supplementary Materials — Appendix S1: the search strategies for the databases. Appendix S2: results of GRADE criteria. [file 6552246.f1.zip]

Archive with 2 entries (2 files):
- Appendix S1 the search strategies for the databases.docx
- Appendix S2 results of GRADE criteria..doc
